# Supplementary material for: Spray Flame Synthesis (SFS) of Lithium Lanthanum Zirconate (LLZO) Solid Electrolyte
Source: MDPI journal article supplement (doi:10.3390/ma14133472), 2021-06-22
Supplement: s1 [file s1]

# Spray Flame Synthesis (SFS) of Lithium Lanthanum Zirconate (LLZO) Solid Electrolyte

Md Yusuf Ali <sup>1</sup>, Hans Orthner <sup>1</sup> and Hartmut Wiggers <sup>1,2,\*</sup>

<sup>1</sup> IVG, Institute for Combustion and Gas Dynamics—Reactive Fluids, University of Duisburg-Essen, 47057 Duisburg, Germany; yusuf.ali@uni-due.de (M.Y.A.); hans.orthner@uni-due.de (H.O.)

<sup>2</sup> CENIDE, Center for Nanointegration Duisburg-Essen, 47057 Duisburg, Germany

\* Correspondence: hartmut.wiggers@uni-due.de

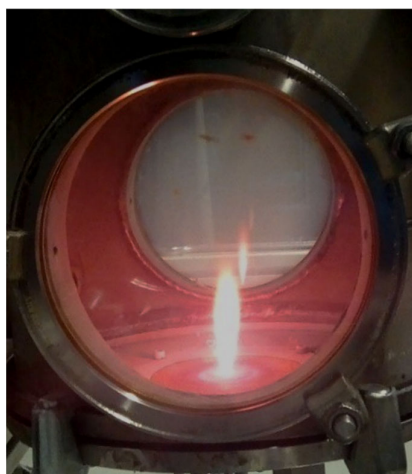

**Figure S1.** Photo of the spray flame taken during the synthesis of LLZO. The red coloration is due to the flame coloration by the lithium.

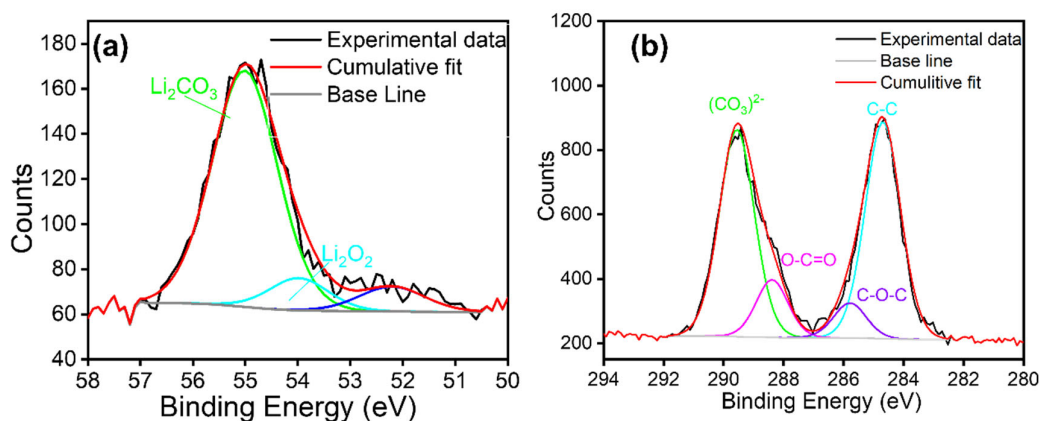

**Figure S2.** Results of XPS measurements (Li 1s (a) and C 1s (b)) of the material produced from Sol<sub>LLZO1</sub>. The particles' surface contains mainly lithium species, which was – based on the C 1s data – identified as lithium carbonate.

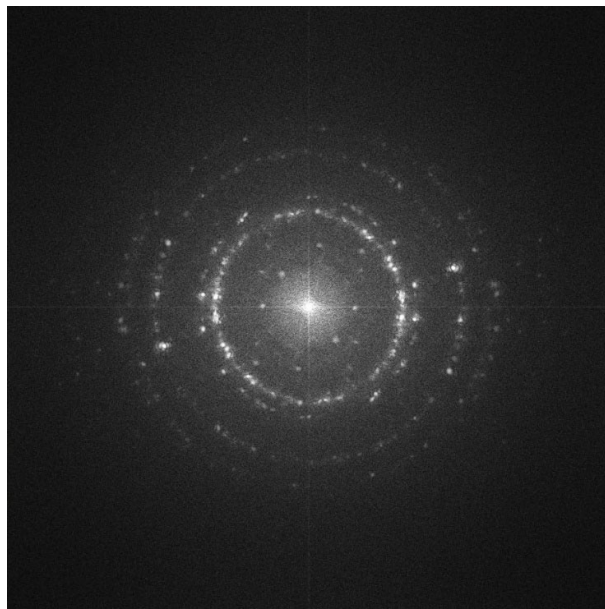

Figure S3. Electron diffraction pattern of sample LLZO2.

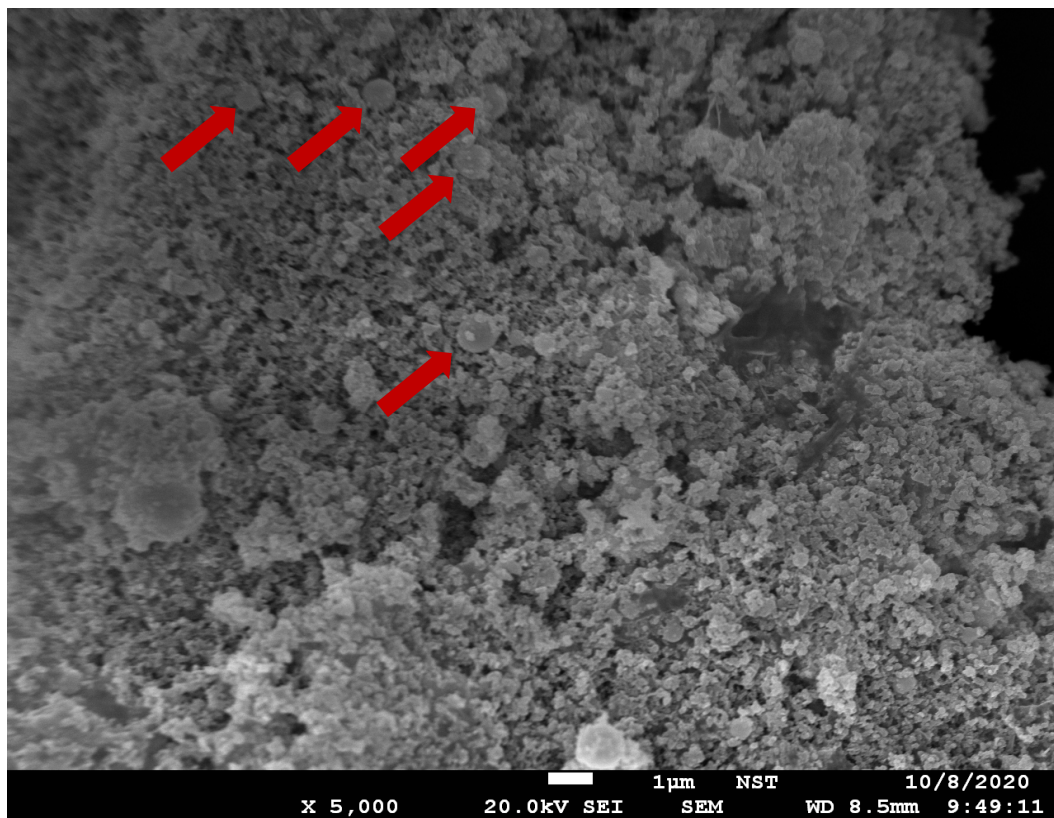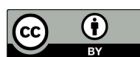

**Figure S4.** FESEM image of as-synthesized powder from Sol<sub>LLZO1</sub>. In addition to the expected nanopowder, spherical particles of a few hundred nanometers can be seen in isolated cases (see red arrows), which are not formed by a gas-to-particle process but by a droplet-to-particle formation process [1].

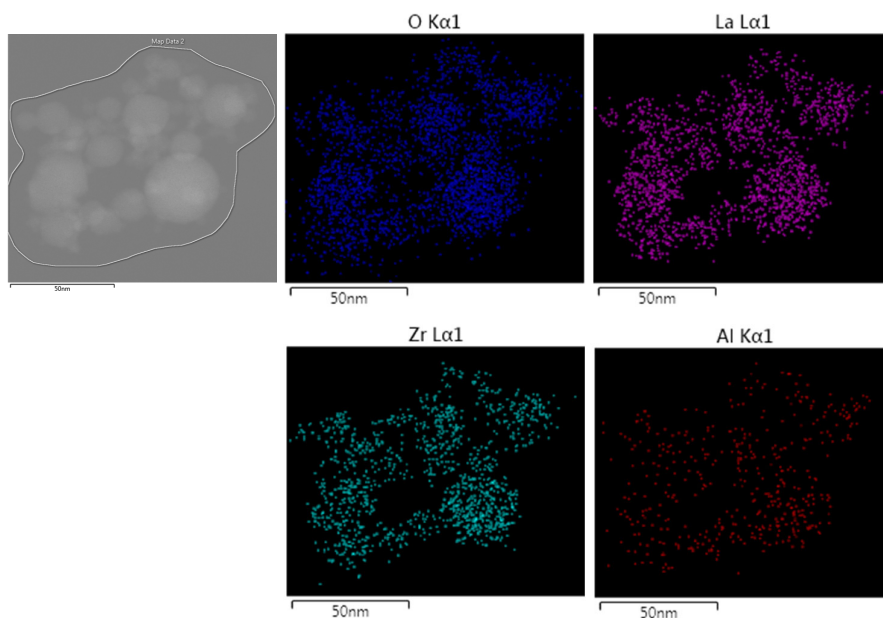

**Figure S5.** Elemental mapping of as-synthesized LZO indicating a homogeneous distribution of the metals within the particles.

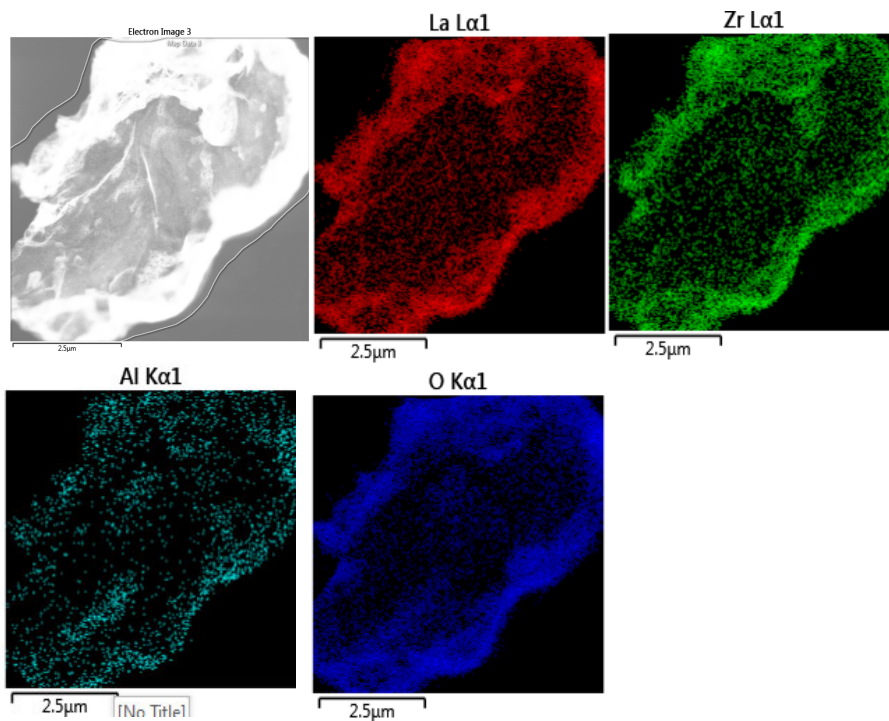

**Figure S6.** Elemental mapping of as-synthesized LLZO1, again indicating a homogeneous distribution of La, Zr, and Al.

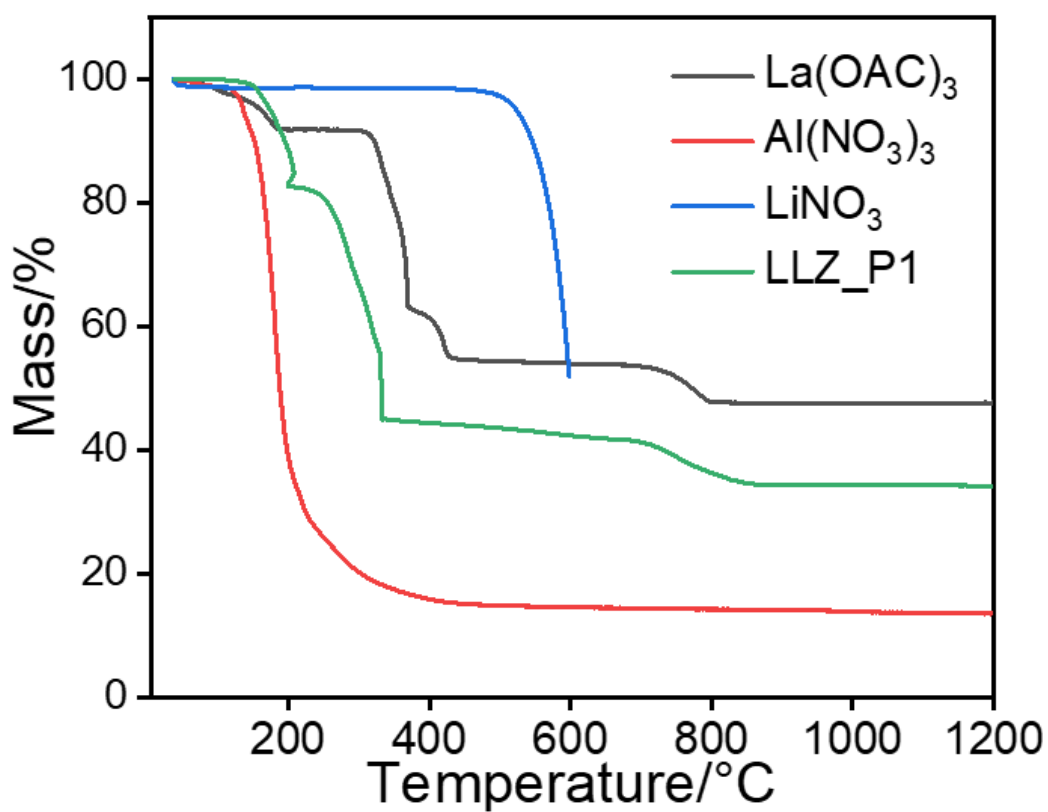

**Figure S7.** TGA of precursors used and a dried precursor solution LLZ\_P1 (LLZO2 precursor solution was evaporated, and the resulting paste was dried). The powders were pressed into pellets before being measured by TGA. Although of the nitrates LiNO<sub>3</sub> has the highest temperature stability, all nitrates decompose at 600 °C. The lanthanum precursor decomposes in several stages, with the most thermally stable compound probably being La<sub>2</sub>O<sub>2</sub>CO<sub>3</sub> as identified in previous work [2].

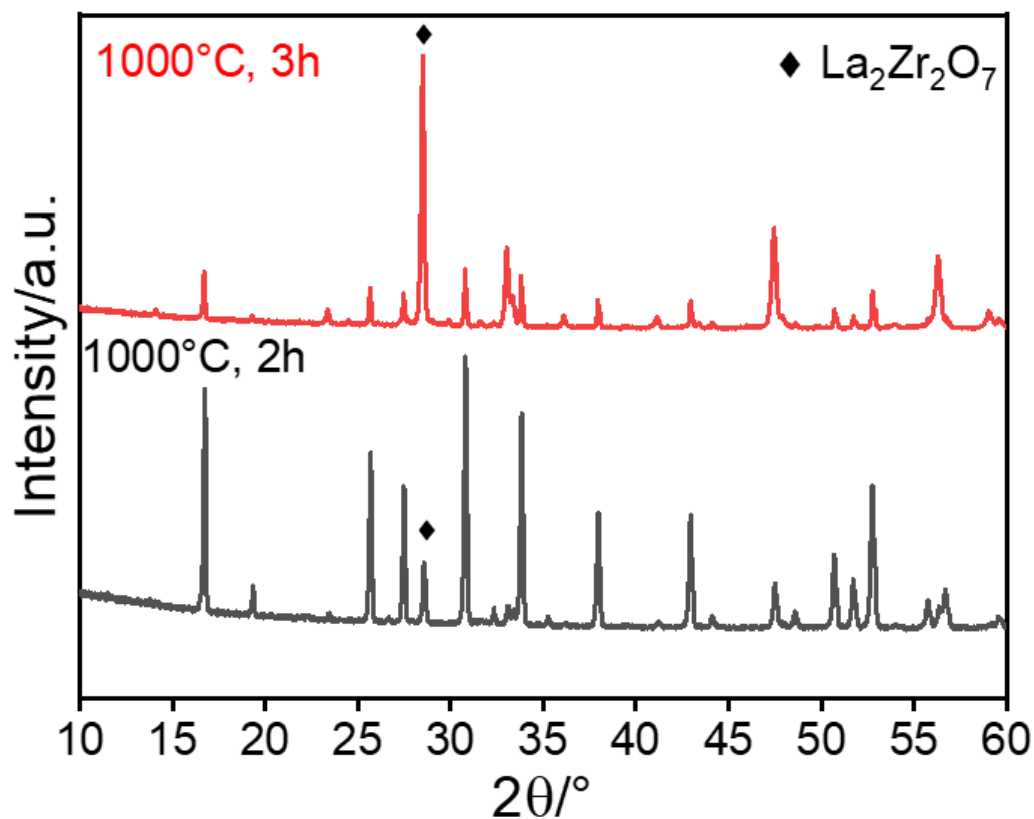

Figure S8. XRD of heated sample of LLZO2 at 1000°C, for 2h (black) and 3h (red). .

#### References:

1. Gurav, A.; Kudas, T.; Pluym, T.; Xiong, Y. Aerosol Processing of Materials. *Aerosol Sci. Technol.* **1993**, *19*, 411–452, doi:10.1080/02786829308959650.
2. Alkan, B.; Cychy, S.; Varhade, S.; Muhler, M.; Schulz, C.; Schuhmann, W.; Wiggers, H.; Andronesco, C. Spray-Flame-Synthesized LaCo 1– x Fe x O 3 Perovskite Nanoparticles as Electrocatalysts for Water and Ethanol Oxidation. *ChemElectro-Chem* **2019**, *6*, 4266–4274, doi:10.1002/celec.201900168.
